# Supplementary material for: A Blended Intervention for Patients With Knee and Hip Osteoarthritis in the Physical Therapy Practice: Development and a Pilot Study
Source: PubMed Central journal article supplement (PMC4785239; doi:10.2196/resprot.5049), 2016-02-24
Supplement: resprot_v5i1e32_app1.pdf [file resprot_v5i1e32_app1.pdf]

## Weekoverzicht

1. basisniveau 20 minuten

2.

3.

4.

5.

6.

7.

8.

9.

10.

11.

12. (korte-termijn)doel 45 minuten

## Activiteit

## Oefeningen

## Informatie

## Info-theek

## Oefen-theek

### Evaluatie van de vorige week

De beweegopdracht van vorige week was:

Beweegopdracht 1: 35 minuten fietsen

Beweegopdracht 2: 35 minuten fietsen

Beweegopdracht 3: 35 minuten fietsen

Kunt u aangeven in hoeverre u deze opdracht heeft uitgevoerd?

- Ik heb precies gedaan wat in de opdracht stond aangegeven
- Ik heb minder gedaan wat in de opdracht stond aangegeven
- Ik heb meer gedaan wat in de opdracht stond aangegeven

Hoeveel pijn heeft u gemiddeld ervaren in de afgelopen week? (0=geen pijn, 10=ondraagelijke pijn)

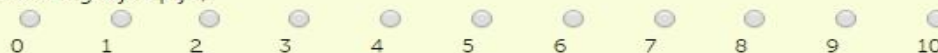

[Evaluatie opslaan](#)

### De opdracht van deze week

Doe op drie verschillende dagen van de week één van de onderstaande beweegopdrachten. Wij adviseren u om de beweegopdrachten te verspreiden over de week, zo voorkomt u overbelasting.

Beweegopdracht 1: 35 minuten fietsen

Beweegopdracht 2: 35 minuten fietsen

Beweegopdracht 3: 40 minuten fietsen

Voor uw oefeningen van deze week verwijzen we u naar het tabblad [Oefeningen](#). Onder het tabblad [Informatie](#) komt u deze week meer te weten over [Beweegplan maken](#).

[Patiënt](#)[Activiteit](#)[Oefening](#)[Info-theek](#)[Oefen-theek](#)[Home](#)[Mijn patiënten](#)[Een patiënt aanmelden](#)[Mijn profiel](#)[Handleiding](#)[FAQ](#)

### Activiteit

Centrale activiteit: fietsen

### Opbouw van het programma

| week | training 1 | training 2 | training 3 | evaluatie | pijn score ( 0 - 10 )<br>(0= geen pijn, 10= ondraaglijke pijn) |
|------|------------|------------|------------|-----------|----------------------------------------------------------------|
| 2    | 10 min.    | 10 min.    | 10 min.    | exact     | 4                                                              |
| 3    | 15 min.    | 15 min.    | 15 min.    |           |                                                                |
| 4    | 15 min.    | 20 min.    | 20 min.    | more      | 3                                                              |
| 5    | 20 min.    | 20 min.    | 20 min.    | more      | 1                                                              |
| 6    | 25 min.    | 25 min.    | 25 min.    |           |                                                                |
| 7    | 25 min.    | 30 min.    | 30 min.    | exact     | 4                                                              |
| 8    | 30 min.    | 30 min.    | 30 min.    |           |                                                                |
| 9    | 35 min.    | 35 min.    | 35 min.    |           |                                                                |
| 10   | 35 min.    | 35 min.    | 40 min.    |           |                                                                |
| 11   | 40 min.    | 40 min.    | 40 min.    |           |                                                                |
| 12   | 45 min.    | 45 min.    | 45 min.    |           |                                                                |

Info-theek

[Wat is artrose?](#)

[Bewegen met artrose](#)

[Waardoor ontstaat artrose?](#)

[Artrosemanager](#)

[Bewegen met pijn](#)

[Verantwoord bewegen](#)

[Pijn en ontspanning](#)

[Gezondheidsvoordelen](#)

[Leefstijladviezen](#)

[Bewegplan maken](#)

[Voeding en gewicht](#)

[Een goede nachtrust](#)

[Medicijnen](#)

[Omgaan met uw omgeving](#)

[Omgaan met negatieve gevoelens](#)

[Andere medische hulp](#)

[Vermoeidheid](#)

[Handige websites](#)

Activiteit

Oefeningen

Informatie

Info-theek

Oefen-theek

## Wat is artrose?

Artrose is een veel voorkomende reumatische gewrichtsaandoening waarbij de kwaliteit van het kraakbeen tussen twee gewrichten vermindert. Daarnaast wordt de hoeveelheid kraakbeen minder, waardoor botstukken dichter bij elkaar komen te liggen.

Kraakbeen is een gladde bekleding tussen twee botten en kan worden gezien als de schokdemper van onze gewrichten. Als het kraakbeen dunner wordt, neemt de druk op het bot toe. Hierdoor kunnen er knobbels op het bot ontstaan en soms kan het omliggende weefsel (het gewrichtskapsel) ontstoken raken. Artrose kan in elk gewricht voorkomen, maar in de knie en heup komt artrose het meest voor.

U kunt gewrichten vergelijken met een scharnier. Het laagje glad kraakbeen zorgt ervoor dat het gewricht gemakkelijker kan buigen en strekken. Ook de vloeistof rondom het gewricht (synovia) zorgt ervoor dat botten makkelijk langs elkaar glijden. U kunt zich voorstellen dat door de artrose het gewricht minder soepel loopt.

In het onderstaande plaatje ziet uw links een gezond gewricht en rechts een gewricht dat is aangedaan door artrose. De kraakbeenkussentjes zijn bijna helemaal weg. Het bot probeert de schade te herstellen en wordt daardoor dikker en breder. Aan de rand ontstaan knobbels (osteofyten).

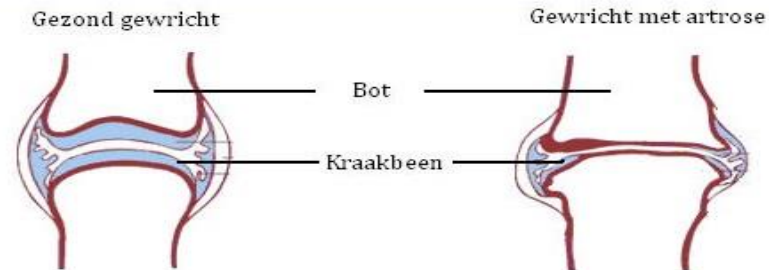

Artrose is een chronische aandoening die in de volksmond vaak "gewrichtsslijtage" wordt genoemd. Het is belangrijk om te weten dat de gewrichten niet slijten, maar dat de kwaliteit minder wordt. Bij het woord "slijtage" wordt namelijk vaak gedacht dat er niets aan te doen is. Artrose zal niet meer overgaan, maar tijdens dit



Patiënt

Activiteit

Oefening

Info-theek

Oefen-theek

[Home](#)[Mijn patiënten](#)[Een patiënt aanmelden](#)[Mijn profiel](#)[Handleiding](#)[FAQ](#)

### Patiënt

Naam: Jan Janssen (corelien@hotmail.com)

Laatste login datum: 18 aug 2015

Aantal keren gebruikt: 14 keer

In week: 10

### Resultaten basismeting

| Datum                                   | Aantal minuten                       | Pijn tijdens activiteit: van 0-10<br>(0= geen pijn, 10= ondraaglijke pijn) |                                              |
|-----------------------------------------|--------------------------------------|----------------------------------------------------------------------------|----------------------------------------------|
| <input type="text" value="12-06-2015"/> | <input type="text" value="20"/> min. | <input type="text" value="5"/>                                             | <input type="button" value="Dag 1 opslaan"/> |
| <input type="text" value="14-06-2015"/> | <input type="text" value="25"/> min. | <input type="text" value="4"/>                                             | <input type="button" value="Dag 2 opslaan"/> |
| <input type="text" value="16-06-2015"/> | <input type="text" value="15"/> min. | <input type="text" value="7"/>                                             | <input type="button" value="Dag 3 opslaan"/> |

### Doelen bepalen

Selecteer voor deze patiënt het korte termijn doel. Het doel dient hoger te zijn dan het huidige niveau. Het huidige niveau is gemiddeld 20 minuten fietsen per sessie

Over 12 weken wil de patiënt  minuten kunnen fietsen.

Het lange termijn doel van de patiënt is

### Beweegplan

## Oefen-theek

Bovenbeenspieren aanspannen

Beenstrekkers

Dijbeenspieren

Kniebuigingen

Uitvalspas

Bilspieren

Hak naar de bil

Kuitspieren

Opstaan uit de stoel

Evenwicht op 1 been

Bruggetje

Binnenkant beenspieren rekken

Bilspier rekken

## Activiteit

## Oefeningen

## Informatie

## Info-theek

## Oefen-theek

### Bilspieren

Ga rechtop achter een stoel of tafel staan. Beweeg uw been, met gestrekte knie, naar achteren en houdt deze houding een drietal seconden vast. Breng vervolgens het been terug.

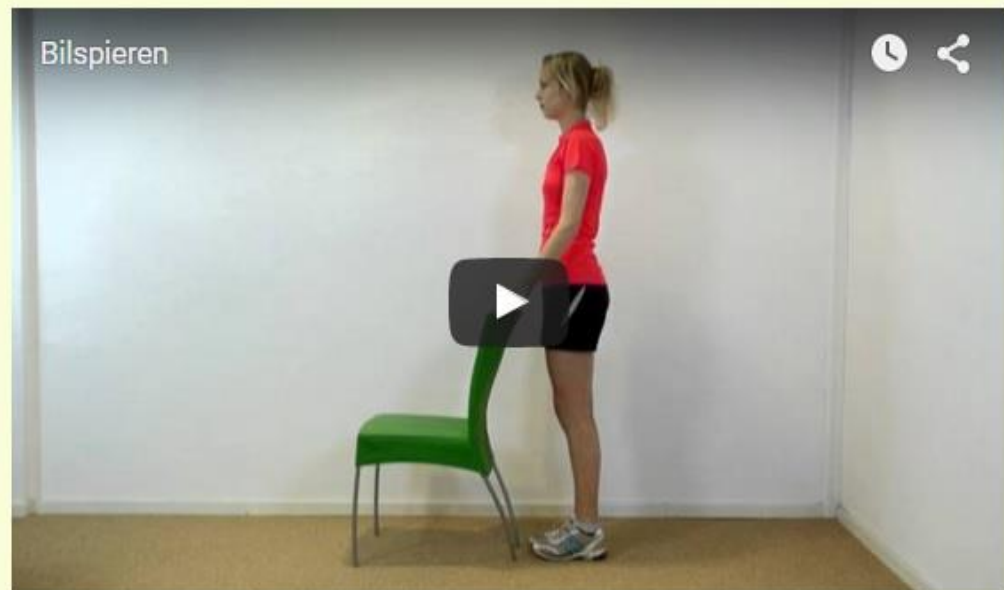

For more information, go to: <https://www.youtube.com/watch?v=4l9GoQWWy58>
